# Supplementary material
Source: PubMed Central journal article supplement (PMC10394575)
Supplement: jama-e2311525-s001.pdf [file jama-e2311525-s001.pdf]

Tu SS, Kesselheim AS, Wetherbee K, Feldman WB. Changes in the number of continuation patents on drugs approved by the FDA. *JAMA*. Published August 1, 2023. doi:10.1001/jama.2023.11525

## Data Sharing Statement

### Data

**Data available:** Yes

**Data types:** Data (not involving human participants)

**How to access data:** [shine.tu@mail.wvu.edu](mailto:shine.tu@mail.wvu.edu)

**When available:** With publication

### Supporting Documents

**Document types:** None

### Additional Information

**Who can access the data:** researchers whose proposed use of the data has been approved

**Types of analyses:** any research purpose

**Mechanisms of data availability:** signed data access agreement
